# Supplementary material for: The N-terminal domain plays a crucial role in the structure of a full-length human mitochondrial Lon protease
Source: PubMed Central journal article supplement (PMC5025710; doi:10.1038/srep33631), 2016-09-16
Supplement: srep33631-s2.pdf [file srep33631-s2.pdf]

## **The N-terminal domain plays a crucial role in the structure of a full-length human mitochondrial Lon protease**

Sami Kereiche<sup>1</sup>■, Lubomír Kováčik<sup>1</sup>■\*, Jan Bednár<sup>1,2</sup>, Vladimír Pevala<sup>3</sup>, Nina Kunová<sup>3</sup>, Gabriela Ondrovičová<sup>3</sup>, Jacob Bauer<sup>3</sup>, Ľuboš Ambro<sup>3</sup>, Jana Bellová<sup>3</sup>, Eva Kutejová<sup>3,4\*</sup>, and Ivan Raška<sup>1</sup>

### **Supplementary information**

#### **Table of contents:**

- 1. Supplementary Figure S1**
- 2. Supplementary Figure S2**
- 3. Supplementary Figure S3**
- 4. Supplementary Figure S4**
- 5. Supplementary Figure S5**
- 6. Supplementary Movie S6**

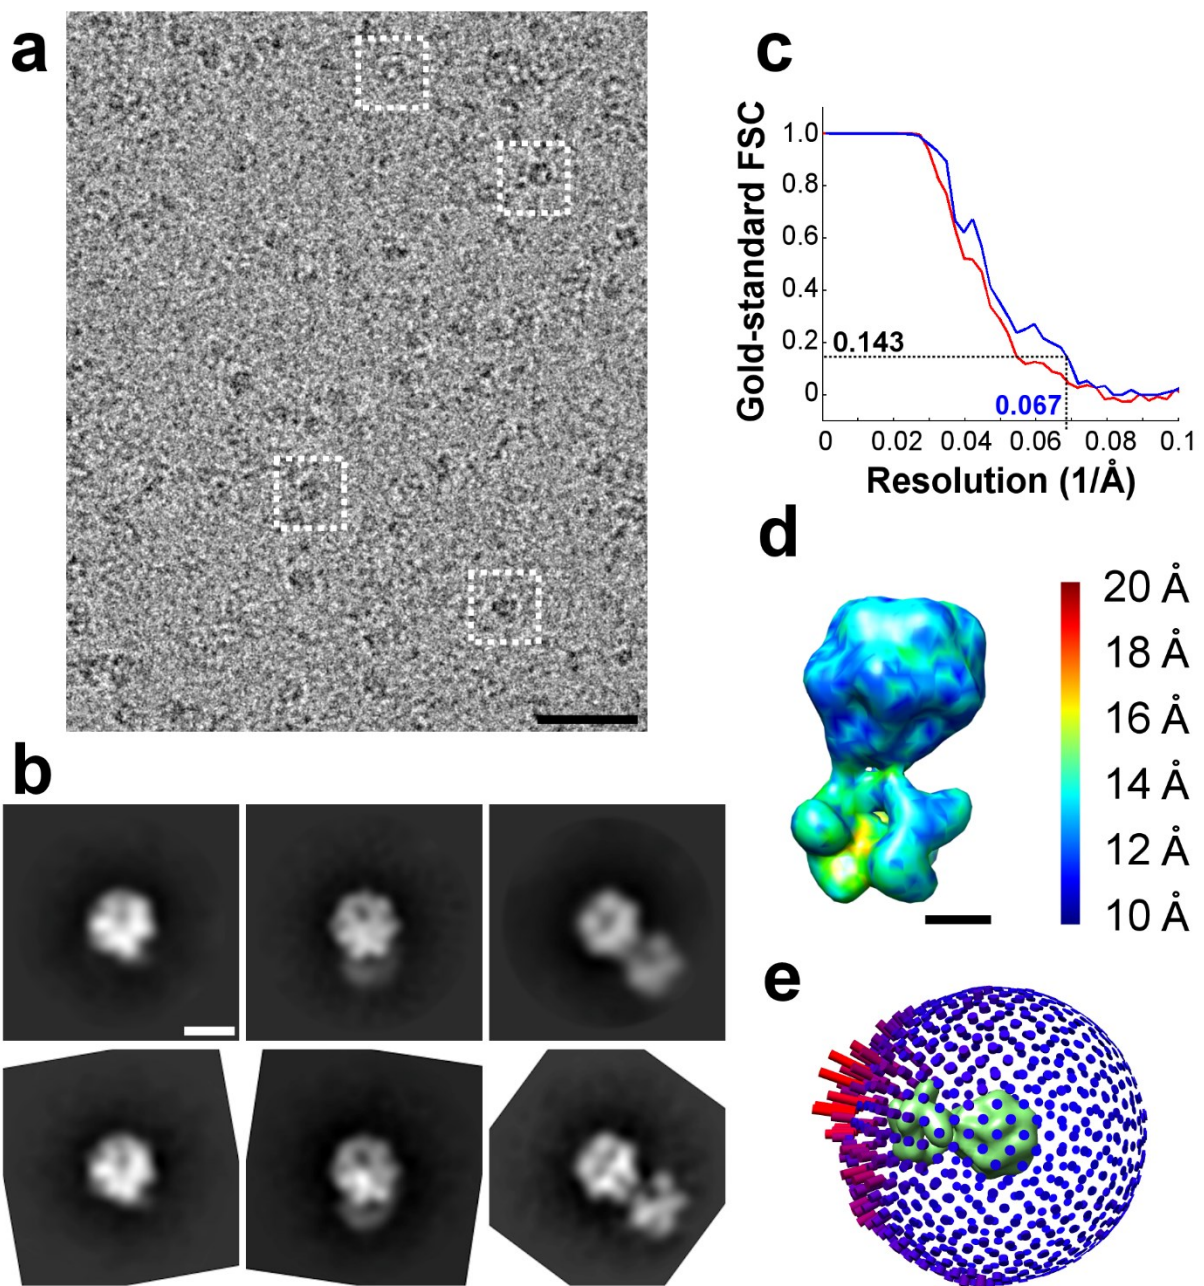

**Supplementary Figure S1.** Results of cryo-EM analysis of *hLon* S855A incubated with AMP-PNP.

a) Sample micrograph captured with a FEI Falcon I detector. Typical particles are boxed. Scale bar: 50 nm. b) Top row: typical class averages resulting from Relion 2D classification. From left to right: a top view, a tilted view, and a side view. Bottom row: matching re-projections of the reconstructed 3D structure. Scale bar: 10 nm. c) Gold standard Fourier Shell Correlation curve of unmasked (red line) and masked (blue line) refined volumes, indicating a resolution of 14.9 Å at the 0.143 level. d) Local resolution map of the reconstructed cryo-EM density. Scale bar: 5 nm. e) Distribution of angular orientations of particles included in the final 3D refinement.

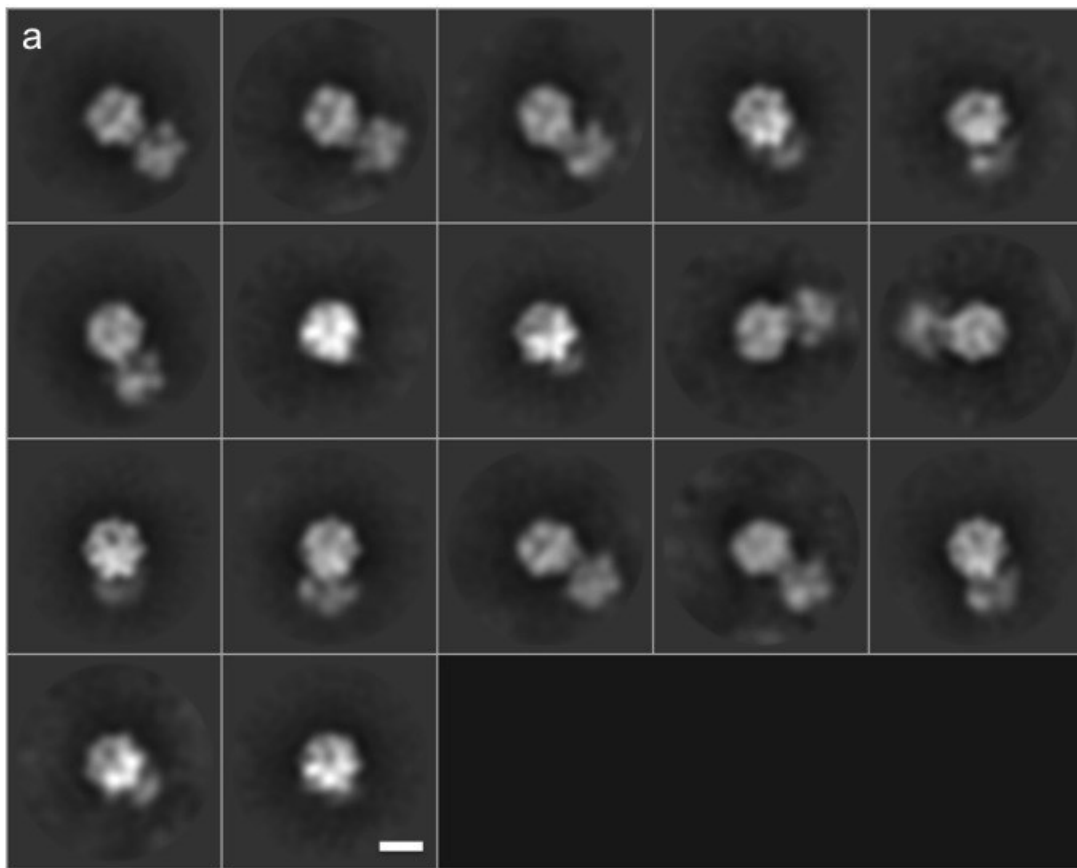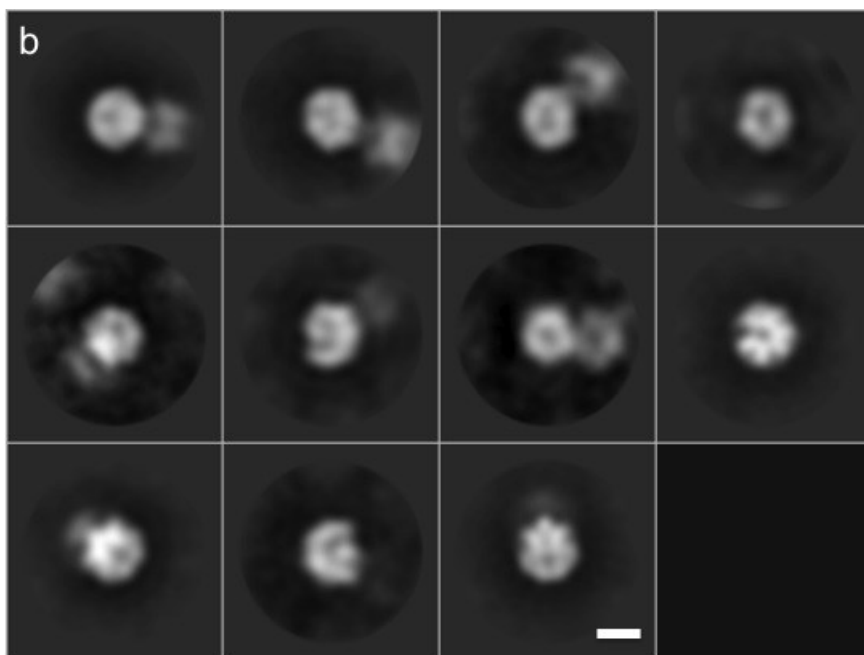

**Supplementary Figure S2.** Class averages after 2D classification of the *hLon* S855A incubated with AMP-PNP (a) and ADP (b). Scale bar: 10 nm.

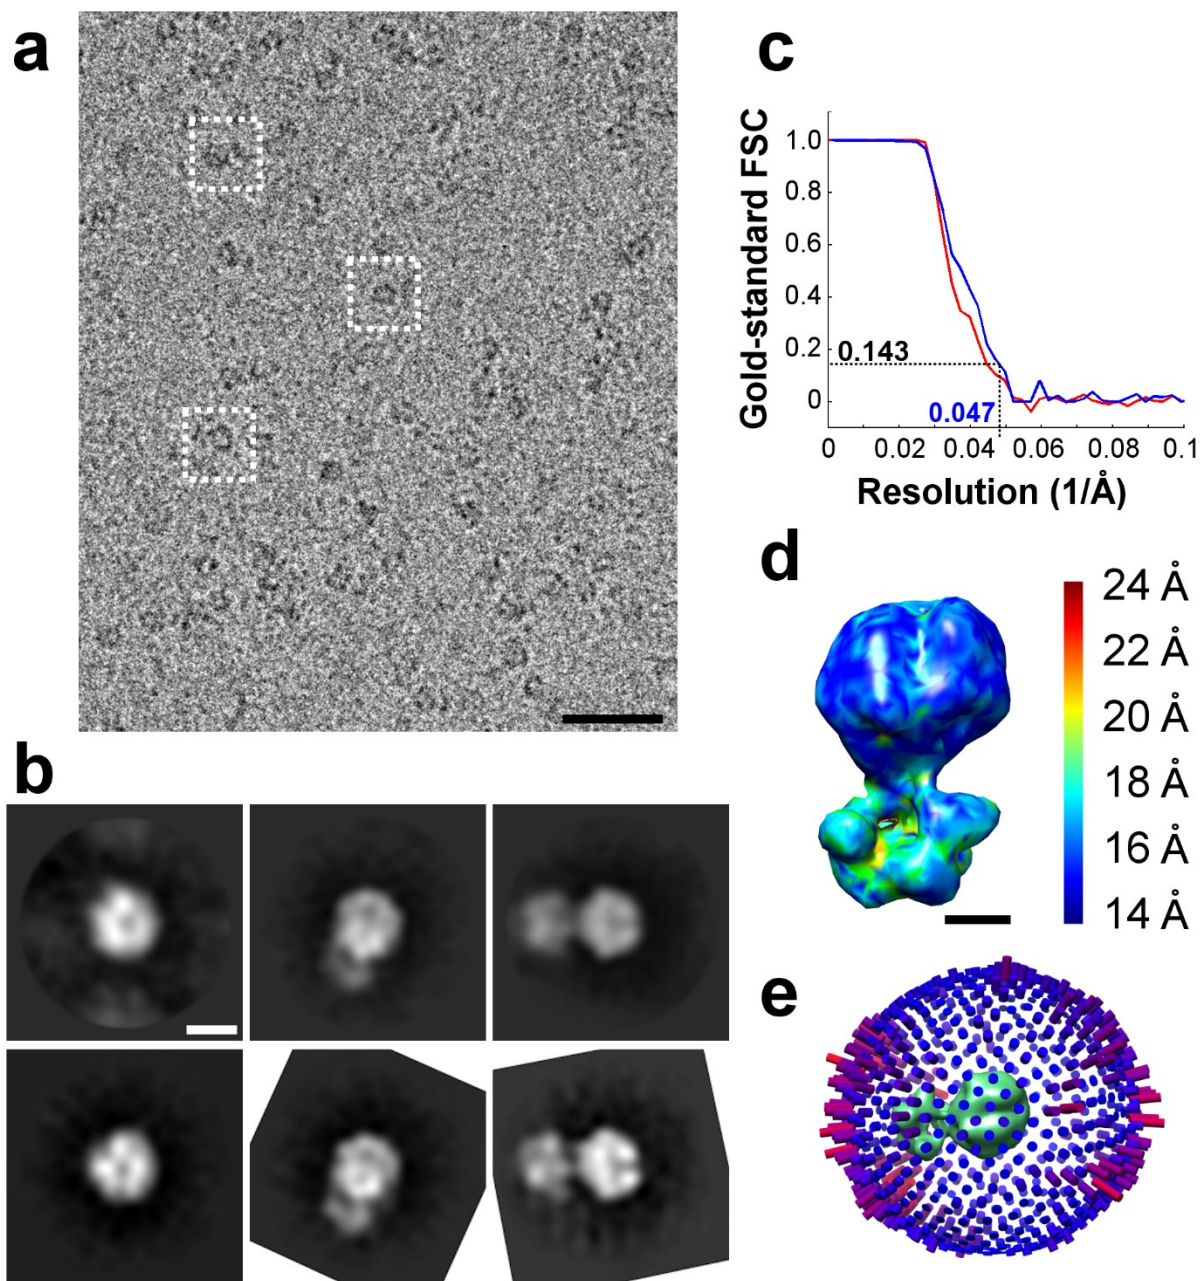

**Supplementary Figure S3.** Results of cryo-EM analysis of *hLon* S855A incubated with ADP.

a) Sample micrograph captured with a FEI Falcon I detector. Typical particles are boxed. Scale bar: 50 nm. b) Top row: typical class averages resulting from Relion 2D classification. From left to right: a top view, a tilted view, and a side view. Bottom row: matching re-projections of the reconstructed 3D structure. Scale bar: 10 nm. c) Gold standard Fourier Shell Correlation curve of unmasked (red line) and masked (blue line) refined volumes, indicating a resolution of 21.3 Å at the 0.143 level. d) Local resolution map of the reconstructed cryo-EM density. Scale bar: 5 nm. e) Distribution of angular orientations of particles included in the final 3D refinement.

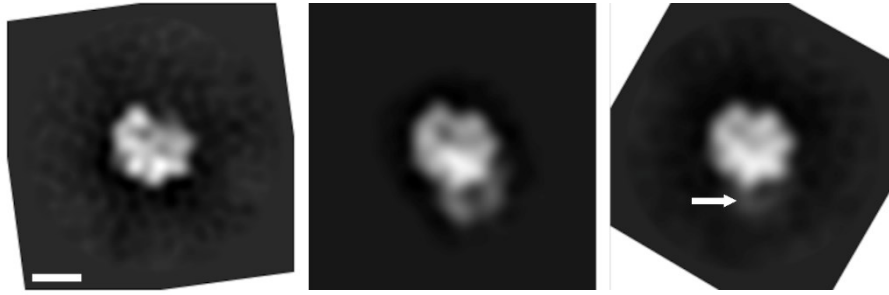

**Supplementary Figure S4.** The tilted-view 2D class of the shortened *hLon*Δ270 mutant lacks the mass of the N-terminal domain.

From left to right: 2D class average of the *hLon*Δ270 mutant lacking the first 156 amino acids acquired by Relion 2D classification, re-projection of the 3D structure of the full-length ADP-incubated S855A mutant in the same orientation, and a matching 2D class average of the full-length ADP-incubated S855A mutant acquired by Relion 2D classification. Scale bar: 10 nm. Arrows point at the density of the N-terminal domain present in the 2D class average of the full-length *hLon* structure. There is no sign of such density in the corresponding projection of the shortened *hLon*Δ270 mutant. The open-ring 3D re-projection of the ADP-incubated full-length S855A mutant was calculated with EMAN2's `e2project3D.py` programme.

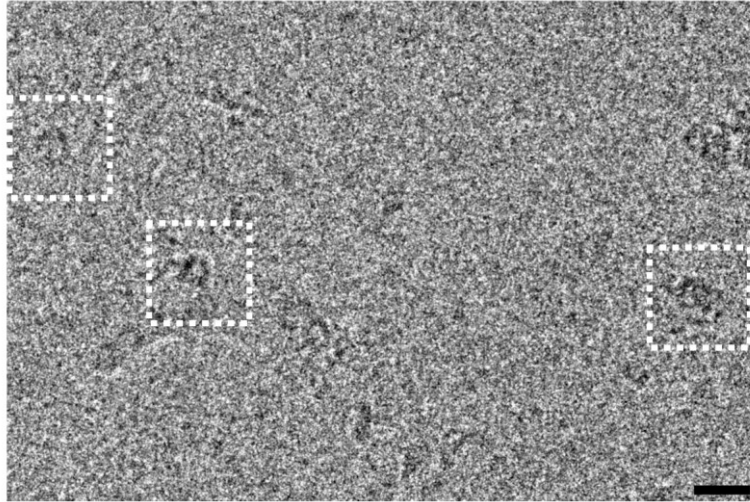

**Supplementary Figure S5.** Sample micrograph of *hLon* $\Delta$ 270 captured with a FEI Falcon II detector. Typical particles are boxed. Scale bar: 20 nm.

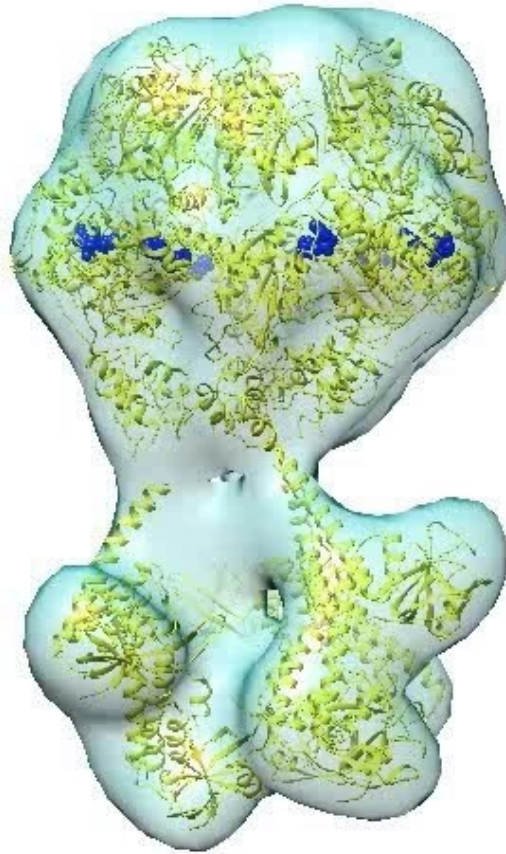

**Supplementary Movie S6.** Visualization of the conformational changes of the *hLon* S855A protease induced by the binding of two different nucleotides.
